# Supplementary material for: Effective TiO2 hybrid heterostructure fabricated on nano mesoporous phenolic resol for visible-light photocatalysis
Source: Royal Society of Chemistry journal article supplement (doi:10.1039/c2jm35042d), 2012-01-01
Supplement: c2jm35042d.pdf [file c2jm35042d.pdf]

## Supporting Information

# Effective TiO<sub>2</sub> hybrid heterostructure fabricated on nano mesoporous phenolic resol for visible-light photocatalysis

Yijun Jiang,\* Lingqian Meng,<sup>†</sup> Xindong Mu,\* Xiutao Li, Haisong Wang, Xiufang Chen, Xicheng Wang, Wei Wang, Feng Wu and Xiaoyan Wang

*Key Laboratory of Biofuels, Qingdao Institute of Bioenergy and Bioprocess Technology, Chinese*

*Academy of Sciences, Qingdao 266101, P. R. China*

*Fax: +86-532-80662724; Tel: +86-532-80662723.*

**Corresponding author: Yijun Jiang and Xindong Mu**

**E-mail: [jiangyj@qibebt.ac.cn](mailto:jiangyj@qibebt.ac.cn); [muxd@qibebt.ac.cn](mailto:muxd@qibebt.ac.cn)**

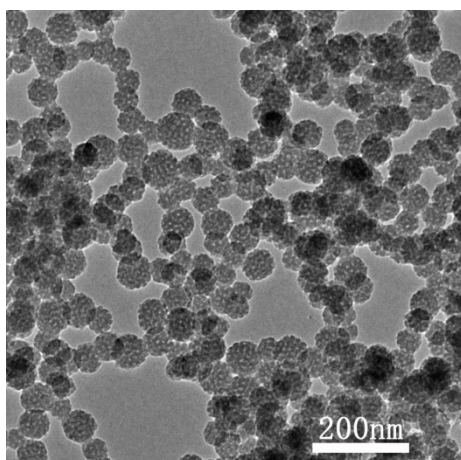

**Figure S1.** TEM image of NS-PR

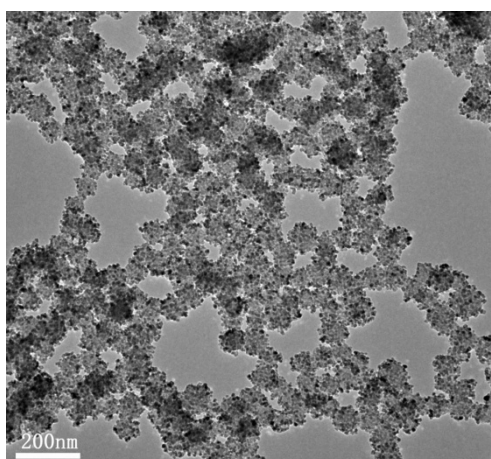

**Figure S2.** TEM image of TiO<sub>2</sub>@NS-PR

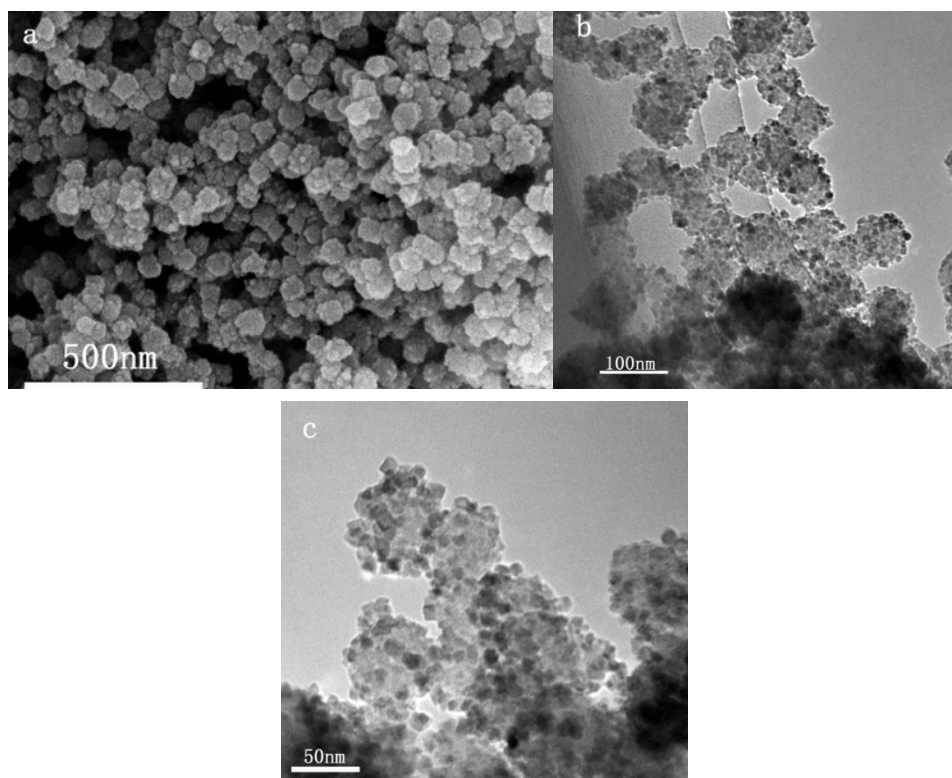

**Figure S3.** SEM images a) and TEM images b,c) of the  $\text{TiO}_2$ @NS-PR-300

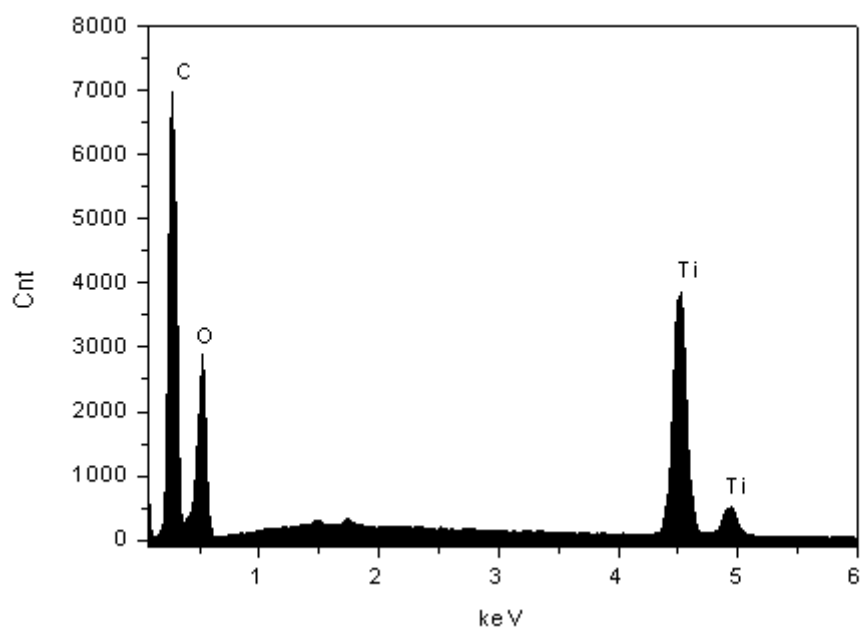

**Figure S4.** EDX of the TiO<sub>2</sub>@NS-PR-300.

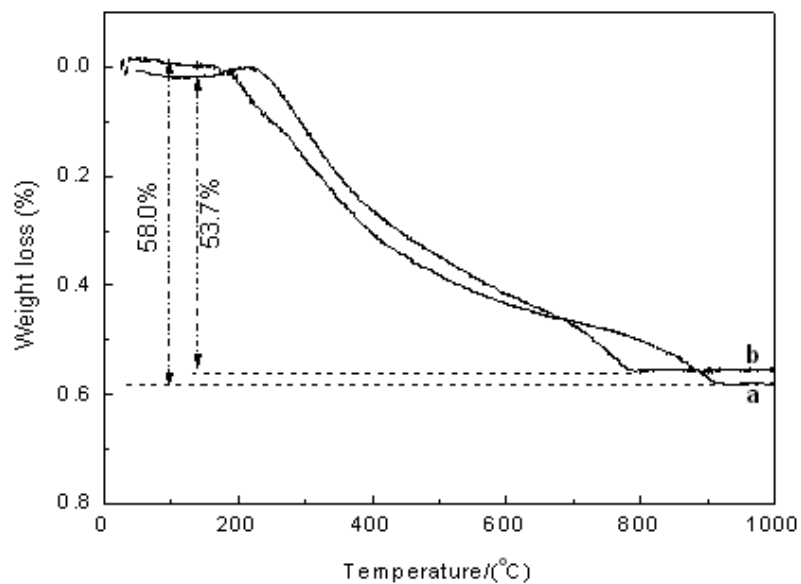

**Figure S5.** TGA curves of TiO<sub>2</sub>@ of the a)TiO<sub>2</sub>@NS-PR and b) TiO<sub>2</sub>@NS-PR-300.

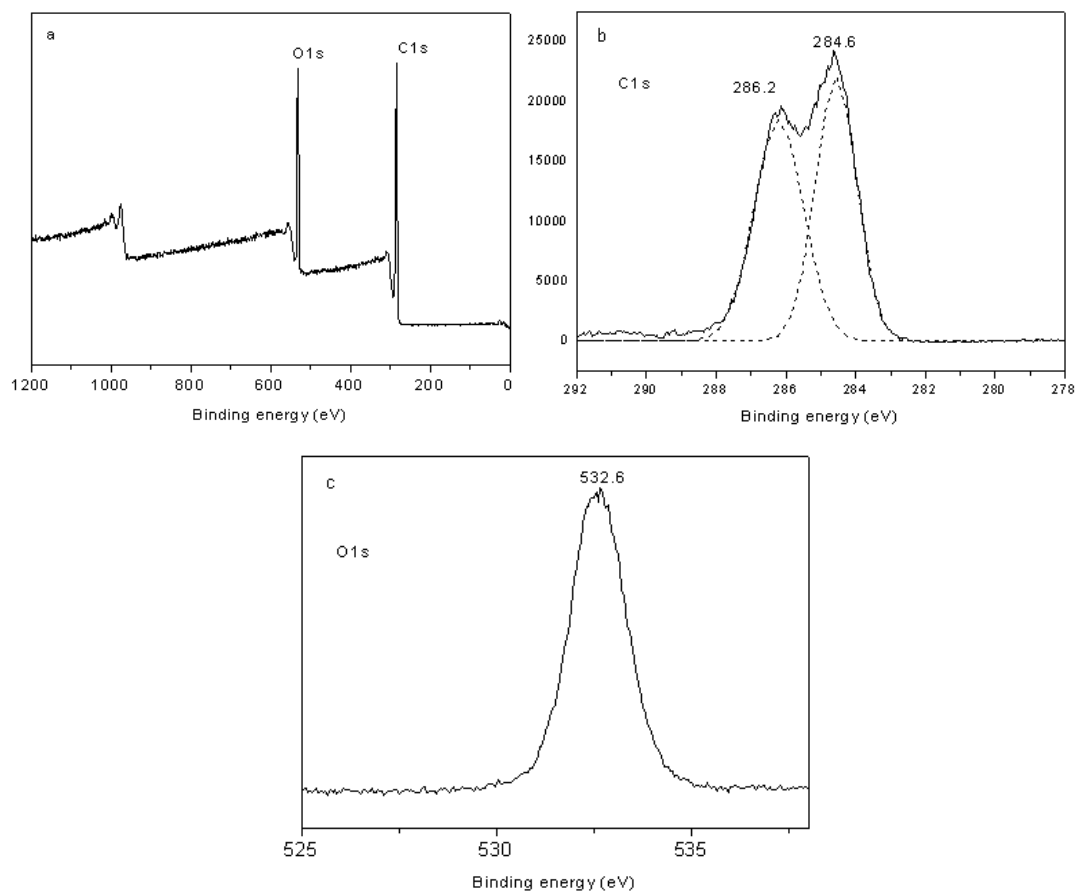

**Figure S6.** XPS of the NS-PR

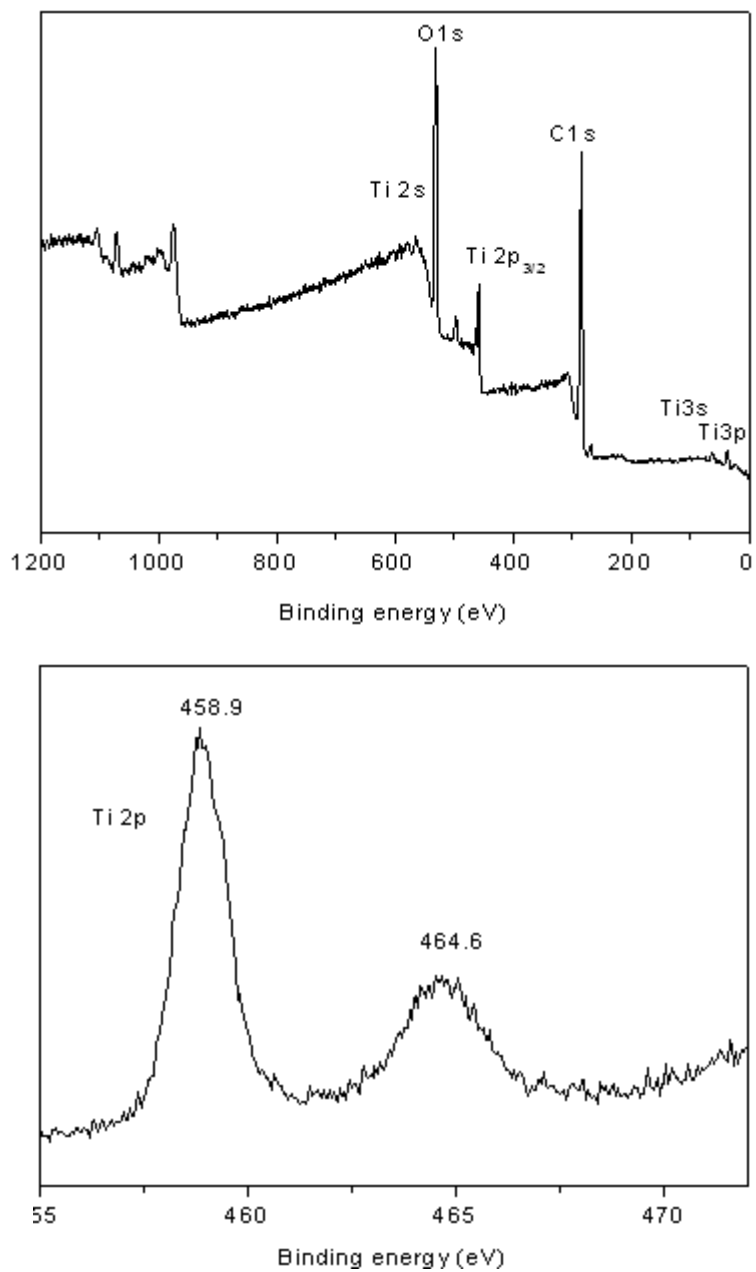

**Figure S7.** XPS of the TiO<sub>2</sub>@NS-PR-300

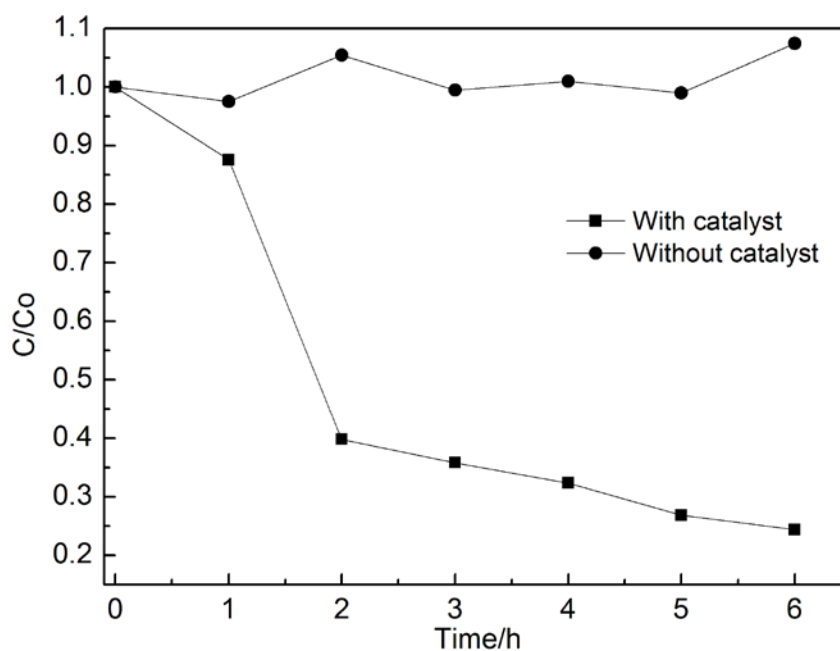

**Figure S8.** Photocatalytic degradation of formaldehyde (FD) over  $\text{TiO}_2@\text{NS-PR-300}$  under visible light irradiation ( $\lambda > 420$  nm).

Reaction conditions: Before the photocatalysis, the FD aqueous solution (50 mL, 20 mg/L) containing the catalyst (0.1g) was stirred in the dark for about 12 h to make sure the equilibrium of adsorption. During the irradiation, about 1.5 mL of suspension was continually taken from the reaction cell at given time intervals for subsequent FD concentration analysis after centrifuging. The FD concentration in the solution was determined by Varian GC with FID detector.

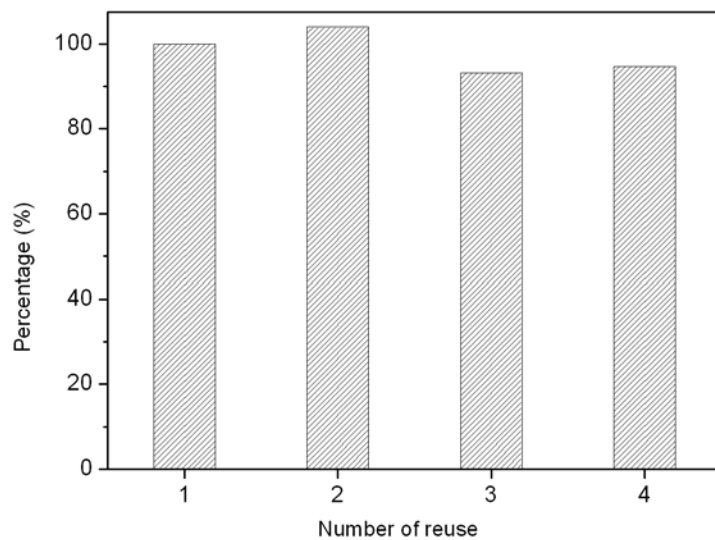

**Figure S9.** Recycle studies of TiO<sub>2</sub>@NS-PR-300.

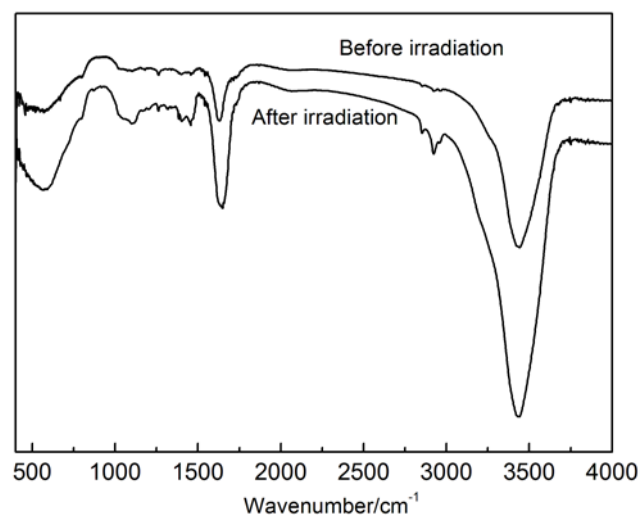

**Figure S10.** The spectrum of FT-IR before and after the visible-light irradiation for 12 h.



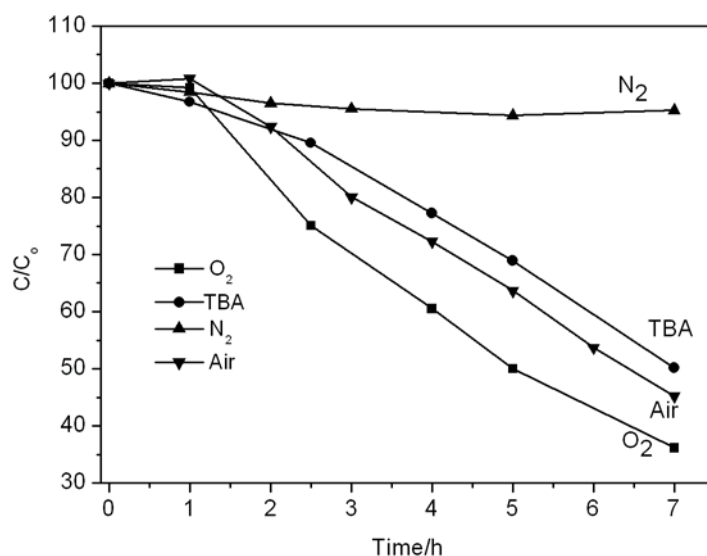

**Figure S11.** Effects of TBA (20 mM) addition, concentration of O<sub>2</sub> on visible-light photocatalytic degradation of MO.

Table S1. The total organic carbon in the water after the irradiation of visible-light.

| sample                            | Total organic carbon (mg/L) | Percent of the TOC in water (%) |
|-----------------------------------|-----------------------------|---------------------------------|
| Decompose completely <sup>a</sup> | 785.78                      | 100                             |
| Irradiation for 0h <sup>b</sup>   | 2.24*                       | 0.29                            |
| Irradiation for 1h                | 3.17                        | 0.40                            |
| Irradiation for 2h                | 2.67                        | 0.34                            |
| Irradiation for 4h                | 5.43                        | 0.69                            |
| Irradiation for 6h                | 4.16                        | 0.53                            |
| Irradiation for 8h                | 5.47                        | 0.70                            |

**Reaction condition:**

0.1g TiO<sub>2</sub>@NS-PR-300 was added into the quartz reactor filled with 50 mL H<sub>2</sub>O, then the mixture was stirred by magnetic bar at 1040 r/min for 12 h at dark (the sample at this time was named Irradiation for 0h). At last, the visible-light irradiation system was turned on,

during the irradiation, about 1.5 mL of suspension was continually taken from the reaction cell at given time intervals for subsequent analysis after centrifugation at 12000 r/min for 15 min and filtering with 0.22  $\mu\text{m}$  filter.

<sup>a</sup> On the assumption that the NS-PR in the  $\text{TiO}_2@\text{NS-PR-300}$  was decomposed completely due to the instability under the photocatalysis. The content of NS-PR was calculated from the analysis of TG result.

<sup>b</sup> This sample has been stirred at dark for 12 h.

\*The TOC in the water was attributed to the  $\text{TiO}_2@\text{NS-PR-300}$  particles which were not get rid of by the centrifugation and filtration due to the small size and observed by TEM.

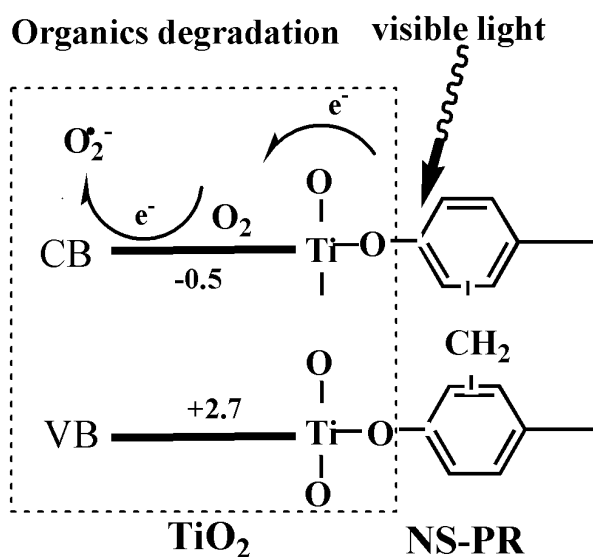

**Scheme S1** The proposed mechanism of visible-light induced photocatalytic degradation.
